# Supplementary material for: Supercoiling Effects on Short-Range DNA Looping in E. coli
Source: PubMed Central journal article supplement (PMC5081198; doi:10.1371/journal.pone.0165306), 2016-10-26
Supplement: pone.0165306.s001.pdf [file pone.0165306.s001.pdf]

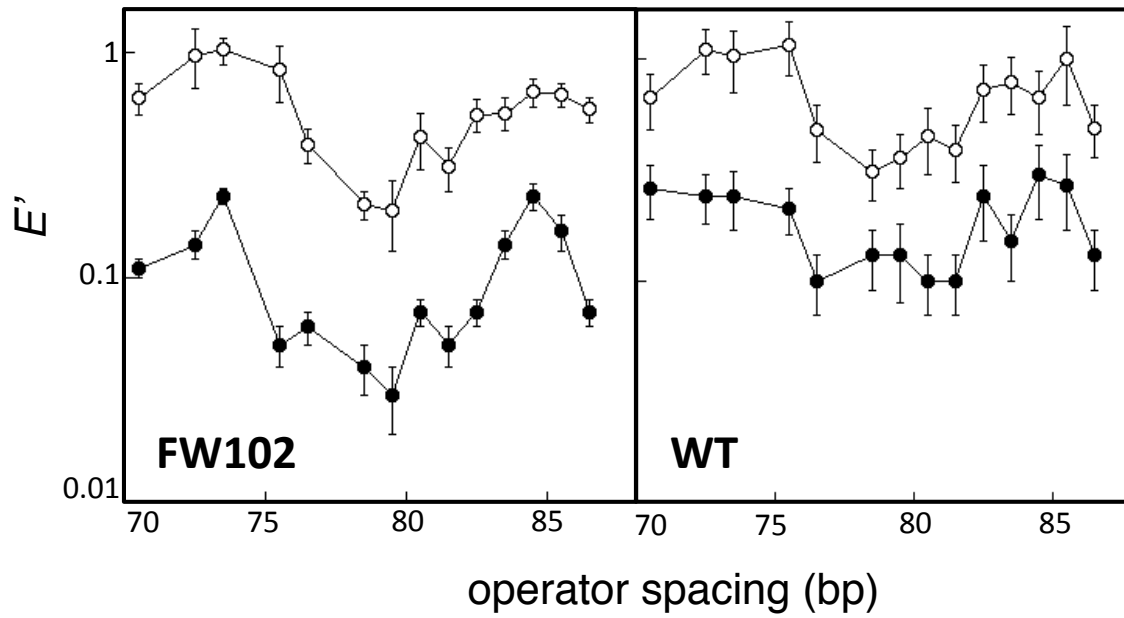

**S1 Figure.** Validation of luciferase reporter.  $E'$  is  $E$  for the test looping construct divided by  $E$  for a construct carrying only  $O_2$  in the proximal position.
